# Supplementary material
Source: PubMed Central journal article supplement (PMC3084136)
Supplement: 1102826108_pnas.201102826SI.pdf [file 1102826108_pnas.201102826SI.pdf]

# Supporting Information

Nicolau et al. 10.1073/pnas.1102826108

## SI Text

**1. Microarray Data Analysis.** We provide details for the microarray data analysis of the *Nederlands Kanker Instituut (NKI)* data (1) consisting of 295 tumors, the *Breast Cancer Normal (BCN)* data (2) consisting of 13 normal breast tissue samples, and the validation data sets *Ullevål University Hospital (ULL)* (3) consisting of 46 tumors of ductal histological type that had been in the study for longer than 10 mo and *HERSCH* (4) consisting of 188 primary breast tumors.

**1.1. Data preprocessing.** Data were retrieved, missing values imputed, then data were collapsed by UniGene cluster ID build 219, and genes present in both the tumor cohort and the normal data set were retained.

For *NKI*, data consisted of 24,479 GeneBank accession IDs on 295 tumor samples, all of which had at least 70% data. Missing data were imputed using a *knn* algorithm (5) with  $k = 10$ . Data were also transformed from the original  $\log_{10}$  values to  $\log_2$ . Data were then collapsed (mean) by UniGene to the mean. The resulting data set consisted of 18,970 UniGene clusters.

For *BCN*, data from 13 normal tissue samples (nine nonneoplastic tissue from cancer patients, four reduction mammoplasty tissue) were retrieved with quality filters for each spot: (i) spot regression correlation  $r > 0.6$ , or (ii) channel 1 mean intensity/median background intensity  $> 1.5$ , or (iii) channel 2 normalized (mean intensity/median background intensity)  $> 1.5$ . Clones with 70% data were retained: 32,644 clone IDs. Missing data were imputed using a *knn* algorithm (5) with  $k = 10$ . Data were then collapsed by UniGene to 18,971 UniGene clusters. Of these, 12,237 UniGene IDs were in common with the *NKI* data set, and 17,441 were in common with the *ULL* data set (see below).

For *ULL*, data from 46 tumors were retrieved with quality filters for each spot: (i) spot regression correlation  $r > 0.6$ , or (ii) channel 1 mean intensity/median background intensity  $> 1.5$ , or (i) channel 2 normalized (mean intensity/median background intensity)  $> 1.5$ . Only clones with 70% good data were retained: 31,667 clone IDs. Missing data were imputed using a *knn* algorithm (5) with  $k = 10$ . Data were then combined with normal tissue data *BCN* and collapsed by UniGene to 17,441 UniGene clusters.

For *HERSCH*, data from 188 primary tumors were retrieved with quality filters for each spot: (i) spot regression correlation  $r > 0.6$ , or (ii) channel 1 mean intensity/median background intensity  $> 1.5$ , or (iii) channel 2 normalized (mean intensity/median background intensity)  $> 1.5$ . Only clones with 70% good data were retained: 32,644 clone IDs. Missing data were imputed using a *knn* algorithm (5) with  $k = 10$ . Data were then combined with normal tissue data *BCN* and collapsed by UniGene to 18,896 UniGene clusters.

**1.2. Disease-Specific Genomic Analysis (DSGA).** For *NKI* and *BCN*, data from tumors and normal tissue were combined along the common 12,237 UniGenes, and columns were normalized to have the magnitude of the mean vector magnitude of 13 normal tissue samples. The *Healthy State Model (HSM)* was constructed from normal tissue data  $\{\vec{N}_1, \dots, \vec{N}_{13}\}$  as follows: *FLAT* construction (2) is a method to de-sparse the data in high dimensions by substituting for each normal tissue vector  $\vec{N}_i$ , its fit  $\hat{N}_i$  to a linear model in the other normal tissue vectors:

$$\hat{N}_i = \sum_{\substack{1 \leq j \leq 13 \\ j \neq i}} \beta_j \vec{N}_j.$$

This was shown to decrease noise in simulated data and help identify a good dimension reduction for *Principal Component*

*Analysis (PCA)*. We use a method described in ref. 2 to compute the Wold invariant (6) designed to measure a version of signal-to-noise ratio:

$$W(l) = \left( \frac{\lambda_l^2}{\lambda_{l+1}^2 + \dots + \lambda_{13}^2} \right) \frac{(n-l-1)(13-l)}{(n+13-2l)}.$$

Fig. S1 plots  $W(l)$  vs. the dimension  $l$  and shows a jump at  $l = 10$ , indicating that signal-to-noise ratio is higher at dimension 10, thereby justifying *PCA* dimension reduction of the *FLAT* normal data to 10. This produced the 10 dimensional *HSM*. Linear models are then used to compute the fitted tumor data matrix to the *HSM* (normal component *Nc.mat*) and the residuals (disease component *Dc.mat*). Along with tumor data, a leave-one-out procedure gives an estimate of the deviation of normal tissue data from the model of the healthy state *HSM*. Details of this procedure are found in ref. 2.

The validation data sets *ULL* and *HERSCH* were similarly transformed using the same normal data set *BCN*.

For gene thresholding, the 12,237 genes in the disease component matrix *Dc.mat* of tumors were reduced to 262 through the following method of testing for significance in deviation from the null hypothesis space. For each gene we computed the 5th and 95th percentiles of values in the disease components of the 295 tumors, and we recorded the larger of the two in absolute value and denoted the collection of these gene-by-gene deviations from normal by *MaxAbs595*. A histogram of these values is seen in Fig. S2. We then computed the 85th and 98th percentiles of *MaxAbs595* and denoted these as *relaxed* threshold and *stringent* threshold, respectively. A total of 1,836 genes exceeded the relaxed threshold, and 245 genes exceeded the stringent threshold. Genes were retained for further analysis if they passed the relaxed threshold and if they were also highly correlated ( $r > 0.6$ ) to at least three genes that passed the stringent threshold. A total of 262 genes satisfied the condition. This method ensures that genes are retained in the analysis if they not only (i) deviate significantly from the null hypothesis space *HSM* but (ii) do so in groups of highly correlated genes. We denote the reduced matrix of disease component of *NKI* data: *nkiDc.mat*. The result of clustering the *nkiDc.mat* array and gene mean-centered can be found in supplementary folder Dataset S1: *nkiDc.AGmc.cdt*. It can be explored with *TreeView* (7), and all of the known clusters of genes can be observed, but because this is not germane to our present study we forgo any in-depth analysis of this clustering.

We did not follow the same thresholding procedure for the validation data sets *ULL* and *HERSCH*; rather, we found that of the 262 genes retained in the *NKI* data set, 255 genes were present in the *ULL* data and 221 in the *HERSCH* data.

**1.3. Progression Analysis of Disease (PAD) on NKI.** We give details of *PAD* on the reduced and *DSGA*-transformed *NKI* data matrix: *nkiDc.mat* of 295 tumors and 262 genes. First, this was combined with the leave-one-out matrix that estimates normal tissue: *bcnL1.mat*. The *Mapper* filter function was computed on each column vector, as explained in the main text (Eq. 2). The image space was then fragmented into 15 intervals, with 80% overlap. Two outputs of mapper were obtained: the first, which included all of the bins, can be found in Fig. 3 (main text). The second provides the tighter streamlined subset of *Mapper* output, by excluding all bins with only one data point in them. The two outputs appear side by side in Fig. S3.

**1.4. Comparison with clustering.** Although *Mapper* incorporates clustering at the local level, the final output captures a wide



Histogram of larger absolute value of  
5th and 95th percentiles for each gene  
NK/ DSGA Disease Component

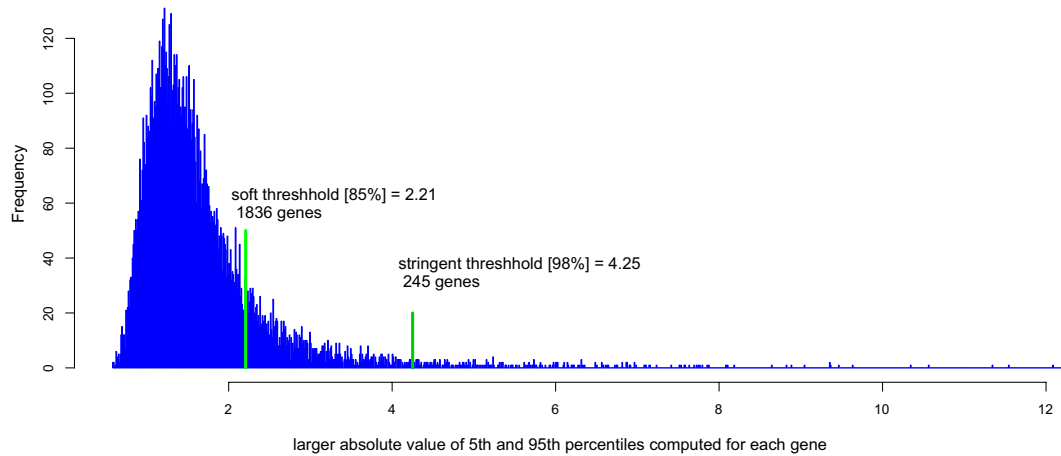

**Fig. S2.** For each gene, the 95th and 5th percentiles of expression levels in the disease component is computed. The larger of the two in absolute value denoted as  $Q_{gene}$  gives an estimate of the extent of deviation from normal for the gene. This deviation can be positive, indicating overexpression relative to normal levels, or negative, indicating underexpression relative to normal levels. The figure shows a histogram of the collection  $Q_{gene}$  of deviations from normal for the set of all genes. There are 1,836 genes for which this value exceeds the 85th percentile (*lax*-threshold genes) and 245 genes for which it exceeds the 95th percentile (*stringent*-threshold genes).

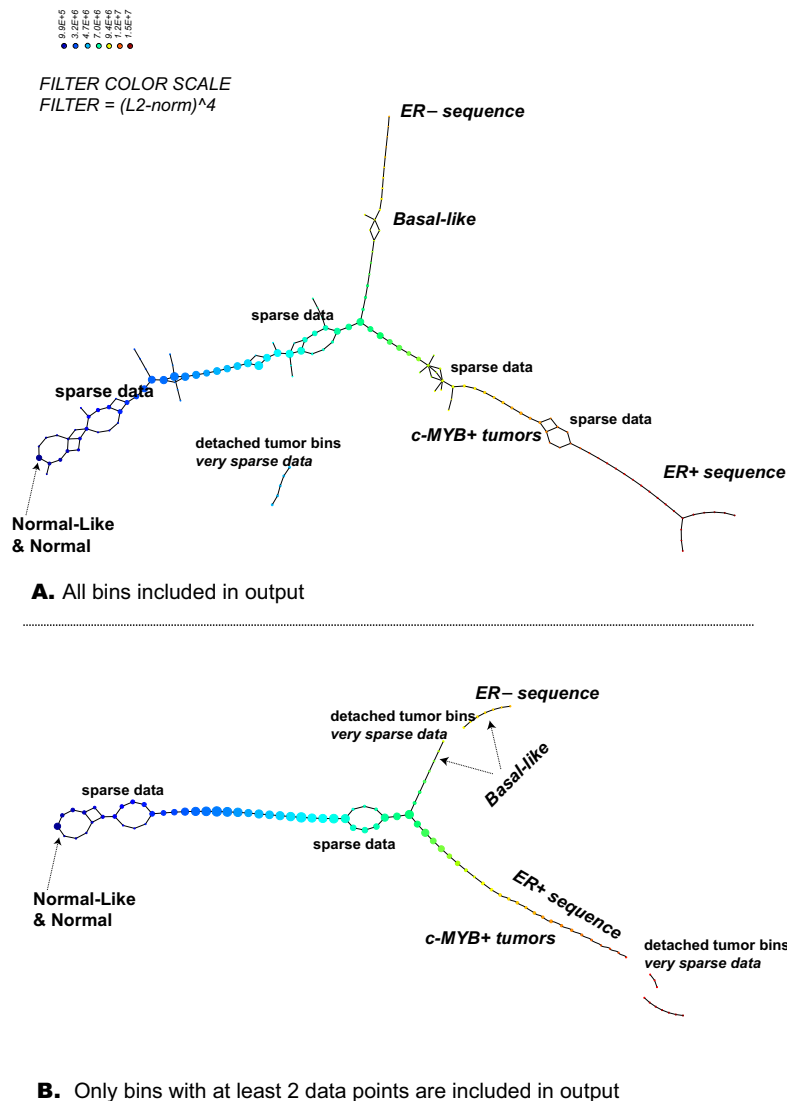

**Fig. S3.** (A) Complete output of the analysis. Each colored disk represents a bin containing several data points or patients. Thus, individual patients (data points) are not visible, and we only see bins containing collections of very similar points. This step provides a simplification of the original set of data points, because instead of showing a multitude of individual points, it shows a much smaller collection of bins, each bin containing a collection of very similar points. The size of bins relates to the number of data points contained in them. Thus, bins containing many data points appear as large discs, whereas bins with few points are drawn much smaller. When two bins have patients in common, an edge connects them. Thus, the bins provide a granularity to the overall set of data points, and the connections between bins, the edges that connect them, capture a rough shape of the data. Each data point has assigned to it a value of the *Mapper* xti filter function, and the bins are colored by the average value of this function for the points in the bin. The legend with assigned colors is seen at the top. In this particular example, each data point is a tumor sample, its gene expression transformed by *DSGA* to measure deviation from the *HSM*. The filter function is the overall amount of deviation from the *HSM*. Thus, red bins contain patients whose overall molecular profiles deviate a lot from normal, whereas blue bins contain patients whose profile is very close to normal. Sometimes data points are quite sparse, and this sparseness is visible in the output as well. When the data points become some what sparse, we see the graph fan out in a slight web-like feature. When data becomes really sparse, pieces of the graph become completely disconnected. Areas of local data sparseness are indicated in the figure. Finally, some bins are very small, containing only a few data points. To get a more streamlined, simplified picture, we can choose to ignore bins that are very small. This is similar to ignoring outliers. (B) Same output, but with bins containing single points not shown. Notice that this more streamlined version loses some of the sparseness information (for example that the long *ER*<sup>+</sup> arm no longer exhibits the sparseness at the halfway point) and accentuates some sparseness areas by causing breaks in some places (for example the *Basal* arm now appears in two pieces).



### PAM analysis c-MYB+ group vs. Normal

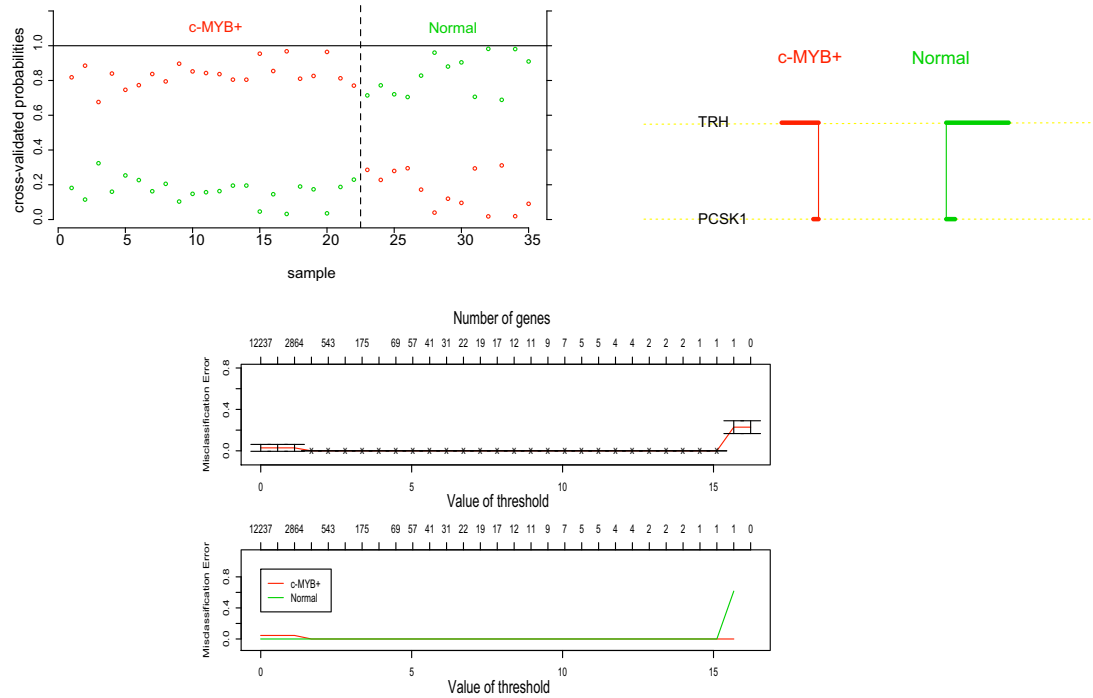

**Fig. S5.** Output of PAM analysis on the *c-MYB*<sup>+</sup> group vs. *Normal* data. Two genes provide class prediction with *error rate* = 0: *TRH*, *TSH-releasing hormone*, and *PCSK1*, *proprotein convertase subtilisin kexin type 1*. The centroids, cross-validation probabilities, and misclassification error plots are shown.

Table S1. Genes significantly up-regulated and down-regulated in *MYB*+ vs. the rest of *ER*+ sequence

| UniGene build 219 | Gene symbol     | q value | Gene information                                                                                               | MYB level vs. rest of <i>ER</i> + sequence |
|-------------------|-----------------|---------|----------------------------------------------------------------------------------------------------------------|--------------------------------------------|
| Hs.654446         | <i>MYB</i>      | 0       | MYB  v-myb myeloblastosis viral oncogene homolog(avian)                                                        | Up                                         |
| Hs.88417          | <i>SUSD3</i>    | 0       | SUSD3  Sushi domain containing 3                                                                               | Up                                         |
| Hs.414028         | <i>C9orf116</i> | 0       | C9orf116  Chromosome 9 ORF 116                                                                                 | Up                                         |
| Hs.532634         | <i>IFI27</i>    | 5.15    | IFI27  IFN, $\alpha$ -inducible protein 27  Hs.532634                                                          | Down                                       |
| Hs.477891         | <i>CPB1</i>     | 5.15    | CPB1  Carboxypeptidase B1 (tissue)  Hs.477891                                                                  | Down                                       |
| Hs.49760          | <i>ORC6L</i>    | 5.15    | ORC6L  Origin recognition complex, subunit 6 like (yeast)  Hs.49760                                            | Down                                       |
| Hs.517307         | <i>MX1</i>      | 5.15    | MX1  Myxovirus (influenza virus) resistance 1, IFN-inducible protein p78 (mouse)  Hs.517307                    | Down                                       |
| Hs.77367          | <i>CXCL9</i>    | 5.15    | CXCL9  Chemokine (C-X-C motif) ligand 9  Hs.77367                                                              | Down                                       |
| Hs.501778         | <i>TRIM22</i>   | 5.15    | TRIM22  Tripartite motif-containing 22  Hs.501778                                                              | Down                                       |
| Hs.521459         | <i>ADAMDEC1</i> | 5.15    | ADAMDEC1  ADAM-like, decysin 1  Hs.521459                                                                      | Down                                       |
| Hs.458485         | <i>ISG15</i>    | 5.15    | ISG15  ISG15 ubiquitin-like modifier  Hs.458485                                                                | Down                                       |
| Hs.109225         | <i>VCAM1</i>    | 5.15    | VCAM1  Vascular cell adhesion molecule 1  Hs.109225                                                            | Down                                       |
| Hs.17518          | <i>RSAD2</i>    | 5.15    | RSAD2  Radical S-adenosyl methionine domain containing 2  Hs.17518                                             | Down                                       |
| Hs.7155           | <i>CMPK2</i>    | 5.15    | CMPK2  Cytidine monophosphate (UMP-CMP) kinase 2, mitochondrial  Hs.7155                                       | Down                                       |
| Hs.20315          | <i>IFIT1</i>    | 6.51    | IFIT1  IFN-induced protein with tetratricopeptide repeats 1  Hs.20315                                          | Down                                       |
| Hs.306777         | <i>GSDMB</i>    | 6.51    | GSDMB  Gasdermin B  Hs.306777                                                                                  | Down                                       |
| Hs.715518         | <i>STAT1</i>    | 6.51    | STAT1  Signal transducer and activator of transcription 1, 91kDa  Hs.715518                                    | Down                                       |
| Hs.709313         | <i>B2M</i>      | 6.51    | B2M  Beta-2-microglobulin  Hs.709313                                                                           | Down                                       |
| Hs.584823         | <i>PLA2G7</i>   | 6.51    | PLA2G7  Phospholipase A2, group VII (platelet-activating factor acetylhydrolase, plasma)  Hs.584823            | Down                                       |
| Hs.181244         | <i>HLA-A</i>    | 6.51    | HLA-A  Major histocompatibility complex, class I, A  Hs.181244                                                 | Down                                       |
| Hs.473341         | <i>SAMSN1</i>   | 6.51    | SAMSN1  SAM domain, SH3 domain and nuclear localization signals 1  Hs.473341                                   | Down                                       |
| Hs.523847         | <i>IFI6</i>     | 6.51    | IFI6  IFN, $\alpha$ -inducible protein 6  Hs.523847                                                            | Down                                       |
| Hs.504641         | <i>CD163</i>    | 6.51    | CD163  CD163 molecule  Hs.504641                                                                               | Down                                       |
| Hs.250615         | <i>CYP2A6</i>   | 15.08   | CYP2A6  Cytochrome P450, family 2, subfamily A, polypeptide 6  Hs.250615                                       | Down                                       |
| Hs.655652         | <i>LILRB2</i>   | 15.08   | LILRB2  Leukocyte Ig-like receptor, subfamily B (with TM and ITIM domains), member 2  Hs.655652                | Down                                       |
| Hs.459265         | <i>ISG20</i>    | 15.08   | ISG20  IFN stimulated exonuclease gene 20kDa  Hs.459265                                                        | Down                                       |
| Hs.926            | <i>MX2</i>      | 15.08   | MX2  Myxovirus (influenza virus) resistance 2 (mouse)  Hs.926                                                  | Down                                       |
| Hs.525157         | <i>TNFSF13B</i> | 15.08   | TNFSF13B  Tumor necrosis factor (ligand) superfamily, member 13b  Hs.525157                                    | Down                                       |
| Hs.86859          | <i>GRB7</i>     | 15.08   | GRB7  Growth factor receptor-bound protein 7  Hs.86859                                                         | Down                                       |
| Hs.352018         | <i>TAP1</i>     | 15.08   | TAP1  Transporter 1, ATP-binding cassette, subfamily B (MDR/TAP)  Hs.352018                                    | Down                                       |
| Hs.32763          | <i>GRIA2</i>    | 15.08   | GRIA2  Glutamate receptor, ionotropic, AMPA 2  Hs.32763                                                        | Down                                       |
| Hs.654585         | <i>PSMB9</i>    | 15.08   | PSMB9  Proteasome (prosome, macropain) subunit, $\beta$ type, 9 (large multifunctional peptidase 2)  Hs.654585 | Down                                       |
| Hs.718626         | <i>KIF20A</i>   | 15.08   | KIF20A  Kinesin family member 20A  Hs.718626                                                                   | Down                                       |
| Hs.474787         | <i>IL2RB</i>    | 15.08   | IL2RB  Interleukin 2 receptor, $\beta$   Hs.474787                                                             | Down                                       |
| Hs.650174         | <i>HLA-E</i>    | 15.08   | HLA-E  Major histocompatibility complex, class I, E  Hs.650174                                                 | Down                                       |

Table S1. Cont.

| UniGene build 219 | Gene symbol    | q value | Gene information                                                                                                                 | MYB level vs. rest of ER <sup>+</sup> sequence |
|-------------------|----------------|---------|----------------------------------------------------------------------------------------------------------------------------------|------------------------------------------------|
| Hs.143961         | <i>CCL18</i>   | 15. 08  | CCL18  Chemokine (C-C motif) ligand 18 (pulmonary and activation-regulated)  Hs.143961                                           | Down                                           |
| Hs.81337          | <i>LGALS9</i>  | 15. 08  | LGALS9  Lectin, galactoside-binding, soluble, 9  Hs.81337                                                                        | Down                                           |
| Hs.474217         | <i>CDC45L</i>  | 15. 08  | CDC45L  CDC45 cell division cycle 45-like (S. cerevisiae)  Hs.474217                                                             | Down                                           |
| Hs.301921         | <i>CCR1</i>    | 15. 08  | CCR1  Chemokine (C-C motif) receptor 1  Hs.301921                                                                                | Down                                           |
| Hs.16362          | <i>P2RY6</i>   | 15. 08  | P2RY6  Pyrimidinergic receptor P2Y, G protein coupled, 6  Hs.16362                                                               | Down                                           |
| Hs.419259         | <i>REC8</i>    | 15. 08  | REC8  REC8 homolog (yeast)  Hs.419259                                                                                            | Down                                           |
| Hs.591742         | <i>IL7R</i>    | 15. 08  | IL7R  Interleukin 7 receptor  Hs.591742                                                                                          | Down                                           |
| Hs.647962         | <i>ZIC1</i>    | 18.67   | ZIC1  Zic family member 1 (odd-paired homolog, Drosophila)  Hs.647962                                                            | Down                                           |
| Hs.43388          | <i>RTP4</i>    | 18. 67  | RTP4  Receptor (chemosensory) transporter protein 4  Hs.43388                                                                    | Down                                           |
| Hs.376208         | <i>LTB</i>     | 18. 67  | LTB  Lymphotoxin β (TNF superfamily, member 3)  Hs.376208                                                                        | Down                                           |
| Hs.14623          | <i>IFI30</i>   | 18. 67  | IFI30  IFN, γ-inducible protein 30  Hs.14623                                                                                     | Down                                           |
| Hs.660866         | <i>CTSL2</i>   | 18. 67  | CTSL2  Cathepsin L2  Hs.660866                                                                                                   | Down                                           |
| Hs.278658         | <i>KRT86</i>   | 18. 67  | KRT86  Keratin 86  Hs.278658                                                                                                     | Down                                           |
| Hs.1051           | <i>GZMB</i>    | 18. 67  | GZMB  Granzyme B (granzyme 2, cytotoxic T lymphocyte-associated serine esterase 1)  Hs.1051                                      | Down                                           |
| Hs.1594           | <i>CENPA</i>   | 18. 67  | CENPA  Centromere protein A  Hs.1594                                                                                             | Down                                           |
| Hs.161985         | <i>TMPRSS4</i> | 18. 67  | TMPRSS4  Transmembrane protease, serine 4  Hs.161985                                                                             | Down                                           |
| Hs.153752         | <i>CDC25B</i>  | 18. 67  | CDC25B  Cell division cycle 25 homolog B (S. pombe)  Hs.153752                                                                   | Down                                           |
| Hs.446352         | <i>ERBB2</i>   | 18. 67  | ERBB2  V-erb-b2 erythroblastic leukemia viral oncogene homolog 2, neuro/glioblastoma derived oncogene homolog (avian)  Hs.446352 | Down                                           |
| Hs.497599         | <i>WARS</i>    | 18. 67  | WARS  Tryptophanyl-tRNA synthetase  Hs.497599                                                                                    | Down                                           |
| Hs.182231         | <i>TRH</i>     | 18. 67  | TRH  TSH-releasing hormone  Hs.182231                                                                                            | Down                                           |
| Hs.521903         | <i>LY6E</i>    | 20.44   | LY6E  Lymphocyte antigen 6 complex, locus E  Hs.521903                                                                           | Down                                           |
| Hs.370036         | <i>CCR7</i>    | 20. 44  | CCR7  Chemokine (C-C motif) receptor 7  Hs.370036                                                                                | Down                                           |



**Table S2. Genes significantly up-regulated and down-regulated in MYB+ vs. Normal tissue**

| UniGene build 219 | Gene symbol     | q value | Gene information                                                                                  | MYB level vs. normal |
|-------------------|-----------------|---------|---------------------------------------------------------------------------------------------------|----------------------|
| Hs.414028         | <i>C9orf116</i> | 0       | C9orf116  Chromosome 9 ORF 116  Hs.414028                                                         | Up                   |
| Hs.406050         | <i>DNALI1</i>   | 0       | DNALI1  Dynein, axonemal, light intermediate chain 1  Hs.406050                                   | Up                   |
| Hs.163484         | <i>FOXA1</i>    | 0       | FOXA1  Forkhead box A1  Hs.163484                                                                 | Up                   |
| Hs.76704          | [Hs.76704]      | 0       | NA  Transcribed locus  Hs.76704                                                                   | Up                   |
| Hs.654446         | <i>MYB</i>      | 0       | MYB  V-myb myeloblastosis viral oncogene homolog (avian)  Hs.654446                               | Up                   |
| Hs.88417          | <i>SUSD3</i>    | 0       | SUSD3  Sushi domain containing 3  Hs.88417                                                        | Up                   |
| Hs.494496         | <i>FBP1</i>     | 0       | FBP1  Fructose-1,6-bisphosphatase 1  Hs.494496                                                    | Up                   |
| Hs.448520         | <i>SLC7A2</i>   | 0       | SLC7A2  Solute carrier family 7 (cationic amino acid transporter, y+ system), member 2  Hs.448520 | Up                   |
| Hs.534847         | <i>C4A</i>      | 0       | C4A  Complement component 4A (Rodgers blood group)  Hs.534847                                     | Up                   |
| Hs.496240         | <i>AR</i>       | 0       | AR  Androgen receptor  Hs.496240                                                                  | Up                   |
| Hs.631650         | <i>GLT8D2</i>   | 0       | GLT8D2  Glycosyltransferase 8 domain containing 2  Hs.631650                                      | Up                   |
| Hs.91109          | <i>PRR15</i>    | 0       | PRR15  Proline rich 15  Hs.91109                                                                  | Up                   |
| Hs.387057         | <i>THSD4</i>    | 0       | THSD4  Thrombospondin, type I, domain containing 4  Hs.387057                                     | Up                   |
| Hs.98265          | <i>ST6GAL2</i>  | 0       | ST6GAL2  ST6 $\beta$ -galactosamide $\alpha$ -2,6-sialyltransferase 2  Hs.98265                   | Up                   |
| Hs.208124         | <i>ESR1</i>     | 0       | ESR1  Estrogen receptor 1  Hs.208124                                                              | Up                   |
| Hs.111779         | <i>SPARC</i>    | 0       | SPARC  Secreted protein, acidic, cysteine-rich (osteonectin)  Hs.111779                           | Up                   |
| Hs.480819         | <i>TBC1D9</i>   | 0       | TBC1D9  TBC1 domain family, member 9 (with GRAM domain)  Hs.480819                                | Up                   |
| Hs.437638         | <i>XBP1</i>     | 0       | XBP1  X-box binding protein 1  Hs.437638                                                          | Up                   |
| Hs.444414         | <i>AFF3</i>     | 0       | AFF3  AF4/FMR2 family, member 3  Hs.444414                                                        | Up                   |
| Hs.524134         | <i>GATA3</i>    | 0       | GATA3  GATA binding protein 3  Hs.524134                                                          | Up                   |
| Hs.467733         | <i>GREB1</i>    | 0       | GREB1  GREB1 protein  Hs.467733                                                                   | Up                   |
| Hs.458573         | <i>PDGFRL</i>   | 0       | PDGFRL  Platelet-derived growth factor receptor-like  Hs.458573                                   | Up                   |
| Hs.210995         | <i>CA12</i>     | 0       | CA12  Carbonic anhydrase XII  Hs.210995                                                           | Up                   |
| Hs.523468         | <i>SCUBE2</i>   | 0       | SCUBE2  Signal peptide, CUB domain, EGF-like 2  Hs.523468                                         | Up                   |
| Hs.654370         | <i>FAP</i>      | 0       | FAP  Fibroblast activation protein, $\alpha$   Hs.654370                                          | Up                   |
| Hs.489142         | <i>COL1A2</i>   | 0       | COL1A2  Collagen, type I, $\alpha$ 2  Hs.489142                                                   | Up                   |
| Hs.416108         | <i>CRKRS</i>    | 0       | CRKRS  Cdc2-related kinase, arginine/serine-rich  Hs.416108                                       | Up                   |
| Hs.371147         | <i>THBS2</i>    | 0       | THBS2  Thrombospondin 2  Hs.371147                                                                | Up                   |
| Hs.519601         | <i>ID4</i>      | 0       | ID4  Inhibitor of DNA binding 4, dominant negative helix-loop-helix protein  Hs.519601            | Up                   |
| Hs.100686         | <i>AGR3</i>     | 0       | AGR3  Anterior gradient homolog 3 ( <i>Xenopus laevis</i> )  Hs.100686                            | Up                   |
| Hs.435655         | <i>ASPN</i>     | 0       | ASPN  Asporin  Hs.435655                                                                          | Up                   |
| Hs.425777         | <i>UBE2L6</i>   | 0       | UBE2L6  Ubiquitin-conjugating enzyme E2L 6  Hs.425777                                             | Up                   |
| Hs.659093         | [Hs.659093]     | 0       | NA  Transcribed locus  Hs.659093                                                                  | Up                   |
| Hs.93764          | <i>CPA4</i>     | 0       | CPA4  Carboxypeptidase A4  Hs.93764                                                               | Up                   |
| Hs.719277         | <i>SLC39A6</i>  | 0       | SLC39A6  Solute carrier family 39 (zinc transporter), member 6  Hs.719277                         | Up                   |
| Hs.604376         | [Hs.604376]     | 0       | NA  Transcribed locus  Hs.604376                                                                  | Up                   |
| Hs.95612          | <i>DSC2</i>     | 0       | DSC2  Desmocollin 2  Hs.95612                                                                     | Up                   |
| Hs.8059           | <i>SYT4</i>     | 0       | SYT4  Synaptotagmin IV  Hs.8059                                                                   | Up                   |
| Hs.1925           | <i>DSG3</i>     | 0       | DSG3  Desmoglein 3 (pemphigus vulgaris antigen)  Hs.1925                                          | Up                   |
| Hs.8786           | <i>CHST2</i>    | 0       | CHST2  Carbohydrate (N-acetylglucosamine-6-O) sulfotransferase 2  Hs.8786                         | Up                   |
| Hs.24950          | <i>RGSS5</i>    | 0       | RGSS5  Regulator of G protein signaling 5  Hs.24950                                               | Up                   |
| Hs.19492          | <i>PCDH8</i>    | 0       | PCDH8  Protocadherin 8  Hs.19492                                                                  | Up                   |
| Hs.520339         | <i>COL10A1</i>  | 0       | COL10A1  Collagen, type X, $\alpha$ 1  Hs.520339                                                  | Up                   |
| Hs.5210           | <i>GMFG</i>     | 0.46    | GMFG  Glia maturation factor, $\gamma$   Hs.5210                                                  | Up                   |
| Hs.497636         | <i>LAMB3</i>    | 0.46    | LAMB3  Laminin, $\beta$ 3  Hs.497636                                                              | Up                   |
| Hs.6360           | <i>TMCC2</i>    | 0.46    | TMCC2  Transmembrane and coiled-coil domain family 2  Hs.6360                                     | Up                   |
| Hs.34526          | <i>CXCR6</i>    | 0.46    | CXCR6  Chemokine (C-X-C motif) receptor 6  Hs.34526                                               | Up                   |
| Hs.504115         | <i>TRIM29</i>   | 0.85    | TRIM29  Tripartite motif-containing 29  Hs.504115                                                 | Up                   |

Table S2. Cont.

| UniGene build 219 | Gene symbol     | q value | Gene information                                                                            | MYB level vs. normal |
|-------------------|-----------------|---------|---------------------------------------------------------------------------------------------|----------------------|
| Hs.1787           | <i>PLP1</i>     | 0.85    | PLP1  Proteolipid protein 1  Hs.1787                                                        | Up                   |
| Hs.523500         | <i>CD2</i>      | 0.85    | CD2  CD2 molecule  Hs.523500                                                                | Up                   |
| Hs.131431         | <i>EIF2AK2</i>  | 0.85    | EIF2AK2  Eukaryotic translation initiation factor 2- $\alpha$ kinase 2  Hs.131431           | Up                   |
| Hs.136348         | <i>POSTN</i>    | 0.85    | POSTN  Periostin, osteoblast specific factor  Hs.136348                                     | Up                   |
| Hs.193235         | <i>CPLX2</i>    | 0.85    | CPLX2  Complexin 2  Hs.193235                                                               | Up                   |
| Hs.438            | <i>MEOX1</i>    | 1.94    | MEOX1  Mesenchyme homeobox 1  Hs.438                                                        | Up                   |
| Hs.405614         | <i>CTHRC1</i>   | 1.94    | CTHRC1  Collagen triple helix repeat containing 1  Hs.405614                                | Up                   |
| Hs.182231         | <i>TRH</i>      | 0       | TRH  TSH-releasing hormone  Hs.182231                                                       | Down                 |
| Hs.477891         | <i>CPB1</i>     | 0       | CPB1  Carboxypeptidase B1 (tissue)  Hs.477891                                               | Down                 |
| Hs.78977          | <i>PCSK1</i>    | 0       | PCSK1  Proprotein convertase subtilisin/kexin type 1  Hs.78977                              | Down                 |
| Hs.250615         | <i>CYP2A6</i>   | 0       | CYP2A6  Cytochrome P450, family 2, subfamily A, polypeptide 6  Hs.250615                    | Down                 |
| Hs.26770          | <i>FABP7</i>    | 0       | FABP7  Fatty acid binding protein 7, brain  Hs.26770                                        | Down                 |
| Hs.516874         | <i>CHGB</i>     | 0       | CHGB  Chromogranin B (secretogranin 1)  Hs.516874                                           | Down                 |
| Hs.150793         | <i>CHGA</i>     | 0       | CHGA  Chromogranin A (parathyroid secretory protein 1)  Hs.150793                           | Down                 |
| Hs.77367          | <i>CXCL9</i>    | 0       | CXCL9  Chemokine (C-X-C motif) ligand 9  Hs.77367                                           | Down                 |
| Hs.496843         | <i>VGLL1</i>    | 0       | VGLL1  Vestigial like 1 ( <i>Drosophila</i> )  Hs.496843                                    | Down                 |
| Hs.268728         | <i>TTYH1</i>    | 0       | TTYH1  Tweety homolog 1 ( <i>Drosophila</i> )  Hs.268728                                    | Down                 |
| Hs.416073         | <i>S100A8</i>   | 0       | S100A8  S100 calcium binding protein A8  Hs.416073                                          | Down                 |
| Hs.473341         | <i>SAMSN1</i>   | 0       | SAMSN1  SAM domain, SH3 domain and nuclear localization signals 1  Hs.473341                | Down                 |
| Hs.517307         | <i>MX1</i>      | 0       | MX1  Myxovirus (influenza virus) resistance 1, IFN-inducible protein p78 (mouse)  Hs.517307 | Down                 |
| Hs.532634         | <i>IFI27</i>    | 0       | IFI27  IFN, $\alpha$ -inducible protein 27  Hs.532634                                       | Down                 |
| Hs.143961         | <i>CCL18</i>    | 0       | CCL18  Chemokine (C-C motif) ligand 18 (pulmonary and activation-regulated)  Hs.143961      | Down                 |
| Hs.458485         | <i>ISG15</i>    | 0       | ISG15  ISG15 ubiquitin-like modifier  Hs.458485                                             | Down                 |
| Hs.192859         | <i>PCDH10</i>   | 0       | PCDH10  Protocadherin 10  Hs.192859                                                         | Down                 |
| Hs.419259         | <i>REC8</i>     | 0       | REC8  REC8 homolog (yeast)  Hs.419259                                                       | Down                 |
| Hs.470654         | <i>CDCA7</i>    | 0       | CDCA7  Cell division cycle associated 7  Hs.470654                                          | Down                 |
| Hs.32763          | <i>GRIA2</i>    | 0       | GRIA2  Glutamate receptor, ionotropic, AMPA 2  Hs.32763                                     | Down                 |
| Hs.415762         | <i>LY6D</i>     | 0       | LY6D  Lymphocyte antigen 6 complex, locus D  Hs.415762                                      | Down                 |
| Hs.119689         | <i>CGA</i>      | 0       | CGA  Glycoprotein hormones, $\alpha$ polypeptide  Hs.119689                                 | Down                 |
| Hs.278658         | <i>KRT86</i>    | 0       | KRT86  Keratin 86  Hs.278658                                                                | Down                 |
| Hs.17518          | <i>RSAD2</i>    | 0       | RSAD2  Radical S-adenosyl methionine domain containing 2  Hs.17518                          | Down                 |
| Hs.7155           | <i>CMPK2</i>    | 0       | CMPK2  Cytidine monophosphate (UMP-CMP) kinase 2, mitochondrial  Hs.7155                    | Down                 |
| Hs.20315          | <i>IFIT1</i>    | 0       | IFIT1  IFN-induced protein with tetratricopeptide repeats 1  Hs.20315                       | Down                 |
| Hs.418167         | <i>ALB</i>      | 0       | ALB  Albumin  Hs.418167                                                                     | Down                 |
| Hs.372578         | <i>FAM65C</i>   | 0       | FAM65C  Family with sequence similarity 65, member C  Hs.372578                             | Down                 |
| Hs.26225          | <i>GABRP</i>    | 0       | GABRP  Gamma-aminobutyric acid (GABA) A receptor, $\rho$ 1  Hs.26225                        | Down                 |
| Hs.151254         | <i>KLK7</i>     | 0       | KLK7  Kallikrein-related peptidase 7  Hs.151254                                             | Down                 |
| Hs.161985         | <i>TMPRSS4</i>  | 0       | TMPRSS4  Transmembrane protease, serine 4  Hs.161985                                        | Down                 |
| Hs.376208         | <i>LTB</i>      | 0       | LTB  Lymphotoxin $\beta$ (TNF superfamily, member 3)  Hs.376208                             | Down                 |
| Hs.414629         | <i>CCL13</i>    | 0       | CCL13  Chemokine (C-C motif) ligand 13  Hs.414629                                           | Down                 |
| Hs.521459         | <i>ADAMDEC1</i> | 0       | ADAMDEC1  ADAM-like, decysin 1  Hs.521459                                                   | Down                 |
| Hs.79361          | <i>KLK6</i>     | 0       | KLK6  Kallikrein-related peptidase 6  Hs.79361                                              | Down                 |
| Hs.112405         | <i>S100A9</i>   | 0       | S100A9  S100 calcium binding protein A9  Hs.112405                                          | Down                 |
| Hs.49760          | <i>ORC6L</i>    | 0       | ORC6L  Origin recognition complex, subunit 6 like (yeast)  Hs.49760                         | Down                 |
| Hs.647962         | <i>ZIC1</i>     | 0       | ZIC1  Zic family member 1 (odd-paired homolog, <i>Drosophila</i> )  Hs.647962               | Down                 |
| Hs.30743          | <i>PRAME</i>    | 0       | PRAME  Preferentially expressed antigen in melanoma  Hs.30743                               | Down                 |



**Table S3. Testing the MYB signature genes**

| Gene symbol                  | Gene name                                                                             | UniGene build 219 | pval MYB <sup>+</sup> group_UP<br>Normal_LO |
|------------------------------|---------------------------------------------------------------------------------------|-------------------|---------------------------------------------|
| <i>MYC</i>                   | V-myc myelocytomatosis viral oncogene homolog                                         | Hs.202453         | 0.24                                        |
| <i>MYB</i>                   | V-myb myeloblastosis viral oncogene homolog                                           | Hs.654446         | 4.70E-05                                    |
| <i>ADA</i>                   | Adenosine deaminase                                                                   | Hs.654536         | 1.60E-10                                    |
| <i>CDK1</i>                  | Cyclin-dependent kinase 1                                                             | Hs.334562         | 0.00019                                     |
| <i>POLD1</i>                 | Polymerase (DNA directed), $\delta$ 1                                                 | Hs.279413         | 2.60E-11                                    |
| <i>PRTN3</i>                 | Myeloblastin  proteinase 3                                                            | Hs.928            | 0.00014                                     |
| <i>CD4</i>                   | T-cell surface antigen T4/Leu-3                                                       | Hs.631659         | 1                                           |
| <i>VEGF</i>                  | Vascular endothelial growth factor A                                                  | Hs.73793          | 0.62                                        |
| <i>BCL2</i>                  | B-cell CLL/lymphoma 2                                                                 | Hs.150749         | 0.97                                        |
| <i>KIT</i>                   | Proto-oncogene c-Kit  mast/stem cell growth factor receptor                           | Hs.479754         | 1                                           |
| <i>CD34</i>                  | Hematopoietic progenitor cell antigen CD34                                            | Hs.374990         | 1                                           |
| <i>GATA3</i>                 | Transacting T-cell-specific transcription factor GATA-3                               | Hs.524134         | 0.00048                                     |
| <i>MPO</i>                   | Myeloperoxidase                                                                       | Hs.458272         | 0.012                                       |
| <i>HSP70</i>                 | HSPA4  heat shock 70kDa protein 4                                                     | Hs.90093          | 0.00064                                     |
| <i>H2A.Z</i>                 | H2AZ histone                                                                          | Hs.119192         | 0.00028                                     |
| <i>Adora2B</i>               | Adenosine receptor 2B – chicken                                                       | Hs.167046         | 0.01                                        |
| <i>Mcm4</i>                  | CDC21; CDC54; MGC33310; P1-CDC21; hCdc21                                              | Hs.460184         | 2.20E-05                                    |
| <i>GAS41</i>                 | YEATS4;Yeats domeain containing 4                                                     | Hs.4029           | 0.00078                                     |
| <i>NMU</i>                   | Neuromedin U                                                                          | Hs.418367         | 0.38                                        |
| <i>CCNE1</i>                 | Cyclin E1                                                                             | Hs.244723         | 0.00049                                     |
| <i>CCNB1</i>                 | cyclin B1                                                                             | Hs.23960          | 0.021                                       |
| <i>CA1</i>                   | Carbonic anhydrase 1                                                                  | Hs.23118          | 0.00037                                     |
| <i>PDCD4</i>                 | Programmed cell death 4(neoplastic transformation inhibitor)                          | Hs.711490         | 0.019                                       |
| <i>COL1A1</i>                | Collagen type I, $\alpha$ 1                                                           | Hs.172928         | 1                                           |
| <i>COL1A2</i>                | Collagen type I, $\alpha$ 2                                                           | Hs.489142         | 1                                           |
| <i>CD13</i>    <i>ANPEP</i>  | Ananyl (membrane) aminopeptidase                                                      | Hs.1239           | 0.96                                        |
| <i>GBX2</i>                  | Gastrulation brain homeobox 2                                                         | Hs.184945         | 0.61                                        |
| <i>Actn1</i>                 | Actinin, $\alpha$ 1                                                                   | Hs.509765         | 0.9                                         |
| <i>Birc3</i>                 | Baculoviral IAP repeat-containing 3                                                   | Hs.127799         | 1                                           |
| <i>Casp6</i>                 | caspase 6, apoptosis-related cysteine peptidase                                       | Hs.654616         | 3.60E-06                                    |
| <i>Cbx4</i>                  | Chromobox homolog 4 (Pc class homolog, <i>Drosophila</i> )                            | Hs.714363         | 0.00073                                     |
| <i>Copa</i>                  | coatamer protein complex, subunit $\alpha$                                            | Hs.162121         | 0.00017                                     |
| <i>Hspa8</i>                 | Heat shock 70kDa protein 8                                                            | Hs.702021         | 1.80E-05                                    |
| <i>Iqgap1</i>                | IQ motif containing GTPase activating protein 1                                       | Hs.430551         | 0.0047                                      |
| <i>Lca</i>    <i>CLTA</i>    | Clathrin, light chain A                                                               | Hs.522114         | 9.00E-07                                    |
| <i>Mad111</i>                | MAD1 mitotic arrest deficient-like 1 (yeast)                                          | Hs.654838         | 7.30E-10                                    |
| <i>Ppp3ca</i>                | Protein phosphatase 3, catalytic subunit, $\alpha$ isozyme                            | Hs.435512         | 0.42                                        |
| <i>SLC1A5</i>                | Solute carrier family 1 (neutral amino acid transporter), member 5                    | Hs.631582         | 0.032                                       |
| <i>Cox-2</i>    <i>PTGS2</i> | Prostaglandin-endoperoxide synthase 2 (prostaglandin G/H synthase and cyclooxygenase) | Hs.196384         | 0.28                                        |
| <i>TCRD</i>    <i>TRD@</i>   | T-cell receptor $\delta$ locus                                                        | Hs.74647          | 0.79                                        |
| <i>FABP5</i>                 | Fatty acid binding protein 5 (psoriasis-associated)                                   | Hs.408061         | 1                                           |
| <i>DHRS2</i>                 | Dehydrogenase/reductase (SDR family) member 2                                         | Hs.272499         | 0.19                                        |
| <i>TGFB1</i>                 | Transforming growth factor, $\beta$ 1                                                 | Hs.645227         | 0.63                                        |
| <i>CTNNL1</i>                | Catenin (cadherin-associated protein), $\alpha$ -like 1                               | Hs.58488          | 0.00059                                     |
